# Supplementary material for: Nanorods assembly of mesoporous boehmite film on glass: an efficient catalyst for permanganate reduction to MnO2 nanoparticles
Source: Royal Society of Chemistry journal article supplement (doi:10.1039/c000519c), 2010-01-01
Supplement: c000519c.pdf [file c000519c.pdf]

## Nanorods assembly of Mesoporous Boehmite Film on Glass: An Efficient Catalyst for Permanganate Reduction to MnO<sub>2</sub> Nanoparticles

Anirban Dandapat and Goutam De\*

### Electronic Supplementary Information (ESI)

The decomposition of KMnO<sub>4</sub> to MnO<sub>2</sub> NPs is observed to be catalyzed by the unique nanorods assembly of mesoporous boehmite films. For a comparison the reaction was also checked using one commercially available boehmite powder Disperal P2. Since P2 contains nitric acid (checked by FTIR and found nitrate peak at ~1350 cm<sup>-1</sup>), we heat-treated the powder at 300 °C for 2h to remove the nitric acid and water prior to use. The heat-treated powder was also checked by FTIR and XRD. FTIR showed absence of nitrate peak and presence of characteristic peaks of boehmite. XRD also showed characteristics diffraction peaks corresponding to the boehmite (JCPDS PDF # 00-017-0940; 01-073-6509) without any preferred crystallographic orientation. The BET surface area and average pore size value of this heat-treated P2 were estimated by N<sub>2</sub> sorption analysis and found to be 203 m<sup>2</sup>g<sup>-1</sup> and 3.39 nm respectively.

The calculated (considering the density, film thickness and area; also checked by the weight difference of the uncoated and coated substrate) weight of boehmite film material used for the catalytic purpose was found to be 0.0008 ± 0.00005 gm. We have monitored the KMnO<sub>4</sub> decomposition reactions at pH 7 in presence of the heat-treated P2 boehmite powder of 0.0008 (equivalent amount of the film material) and 0.0032 gm (4 times higher). In the former case a slight decrease of the absorption intensity of the set of bands near 545 nm (Fig. S1) was observed after 5 h. In the later case (using of 4 times higher P2) a relatively more decrease in intensity of the set of bands ~545 nm (Fig. S2) was observed. It can be noted here that in these cases no noticeable absorption peak corresponding to the MnO<sub>2</sub> NPs was observed in the UV-visible spectrum (Figs. S1 and S2). It seemed that the KMnO<sub>4</sub> was getting adsorbed by the porous boehmite powder and for this reason an overall decrease in intensities of KMnO<sub>4</sub> related peaks were observed. This result confirmed that the developed nanorod assembled boehmite film is very much active towards the reduction of KMnO<sub>4</sub> to MnO<sub>2</sub> NPs due to its unique nanorod structure with preferred orientation.

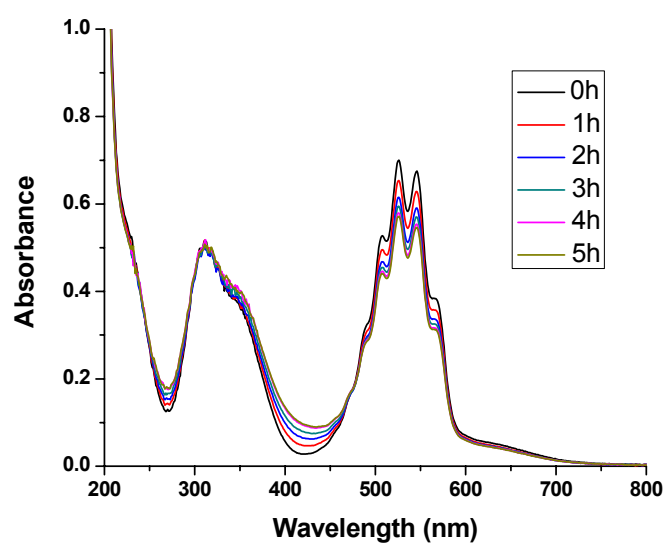

**Fig. S1.** UV-visible spectra of  $\text{KMnO}_4$  solution (pH 7) in the presence of 0.0008 gm heat-treated boehmite powder (P2) recorded up to 5 h.

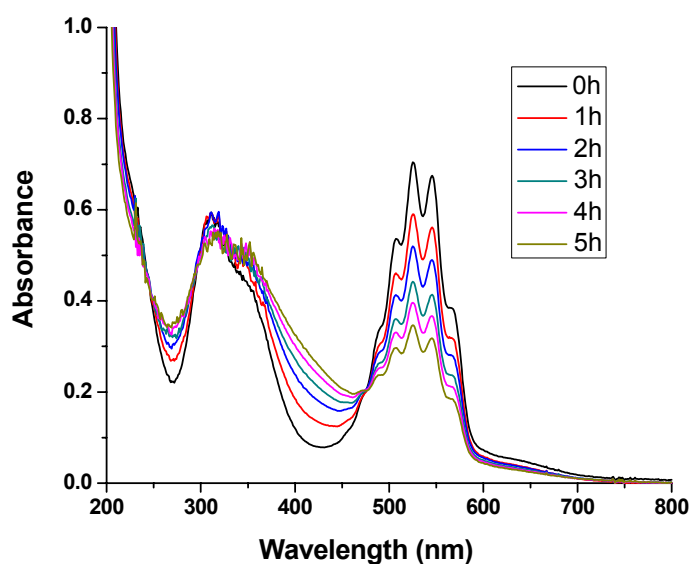

**Fig. S2.** UV-visible spectra of  $\text{KMnO}_4$  solution (pH 7) in the presence of 0.0032 gm heat-treated boehmite powder (P2) recorded up to 5 h.
